# Supplementary material for: Large deformation behavior and effective network chain density of swollen poly(N-isopropylacrylamide)–Laponite nanocomposite hydrogels
Source: Royal Society of Chemistry journal article supplement (doi:10.1039/c1sm06484c), 2011-11-09
Supplement: c1sm06484c.pdf [file c1sm06484c.pdf]

**Electronic supplementary information:**

**Large deformation behavior and effective network chain density of swollen poly(*N*-isopropylacrylamide)-Laponite nanocomposite hydrogels**

**Tao Wang, Dan Liu, Cuixia Lian, Shudian Zheng, Xinxing Liu, and Zhen Tong\***

Research Institute of Materials Science and State Key Laboratory of Luminescent Materials and Devices, South China University of Technology, Guangzhou 510640, China

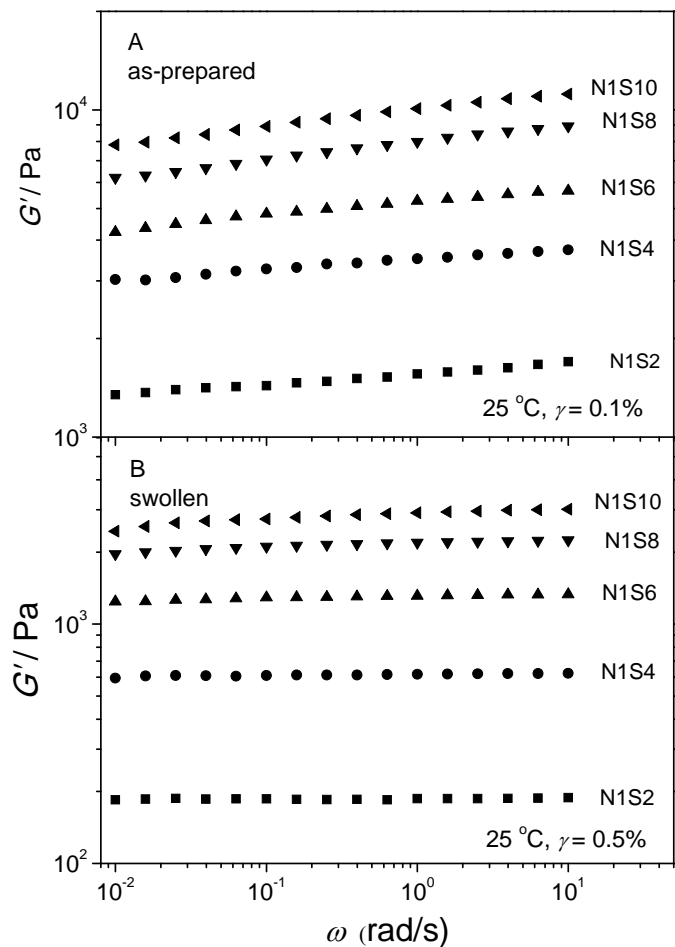

**Fig. S1.** Angular frequency  $\omega$  dependence of storage modulus  $G'$  at 25 °C and indicated shear strain for the as-prepared (A) and swollen (B) PNIPAm NC gels.

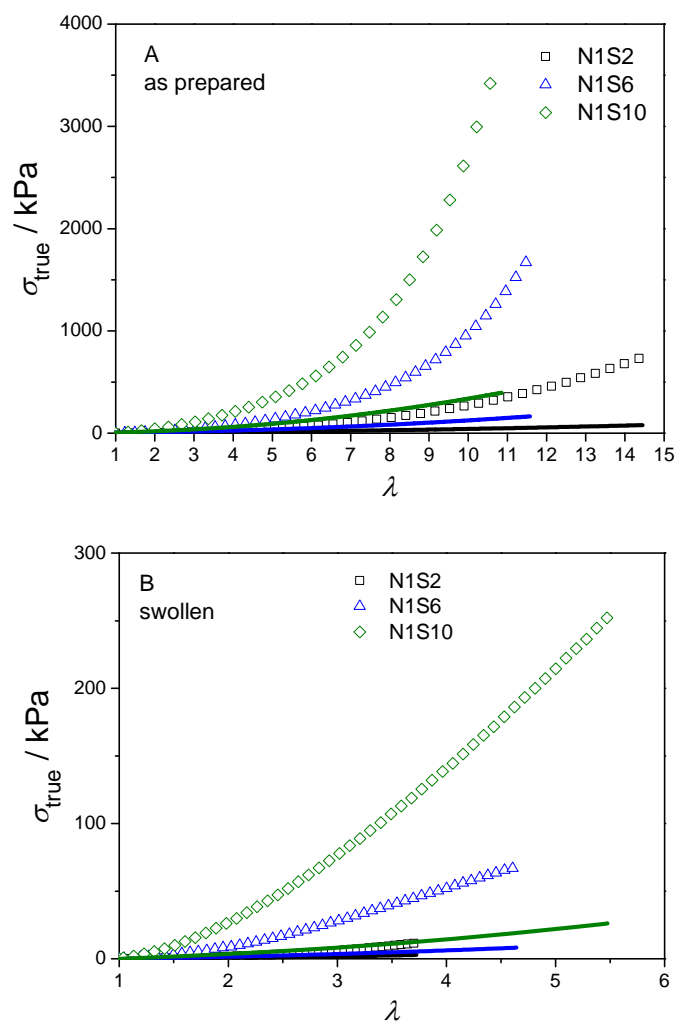

**Fig. S2.** Comparison of tensile true stress data with calculated curve (solid line) based on the Mooney-Rivlin equation (eq. 2) using the  $2C_1$  and  $2C_2$  values in Table 1 from compression data fitting for the as-prepared (A) and swollen (B) NC gels.

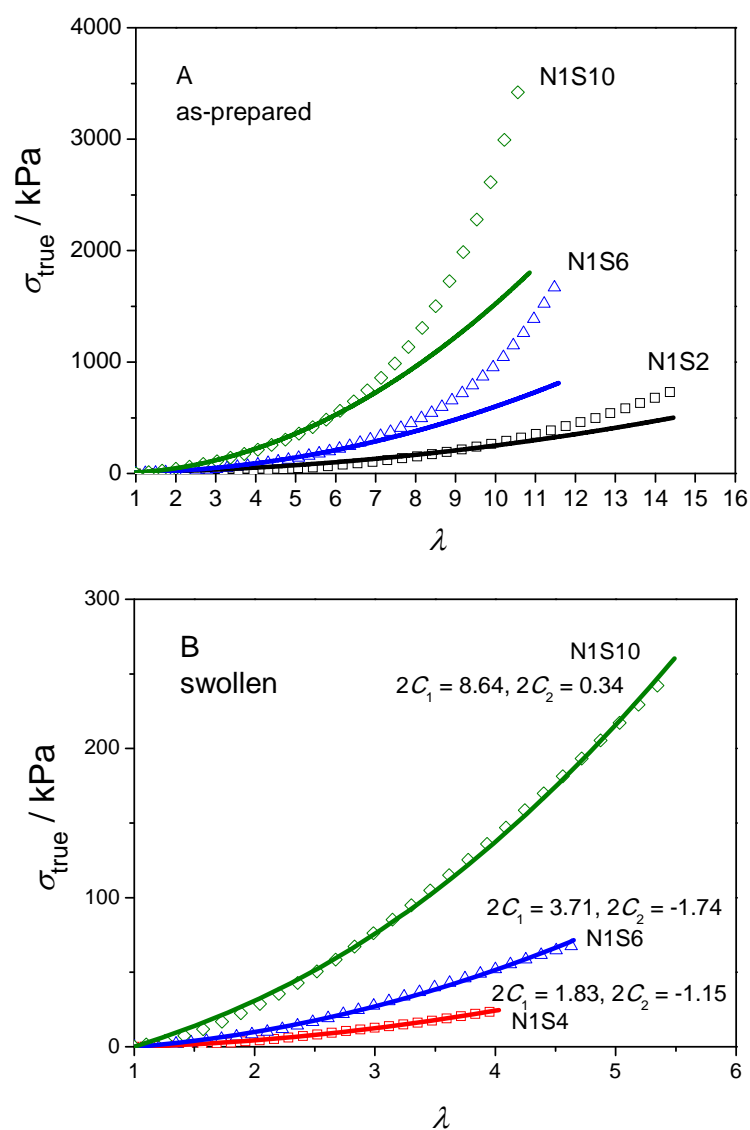

**Fig. S3** Comparison of tensile true stress data with calculated curve (solid line) based on the Mooney-Rivlin equation (eq. 2) using indicated  $2C_1$  and  $2C_2$  values from fitting tensile data for the as-prepared (A) and swollen (B) NC gels.
